# Supplementary material for: Dopamine maintains network synchrony via direct modulation of gap junctions in the crustacean cardiac ganglion
Source: eLife journal article supplement (doi:10.7554/elife.39368), 2018-10-16
Supplement: supp [file elife-39368-supp-v1.zip]

Archive with 1 entries (1 files):
- elife_poa_e39368_Transparent_Reporting_File.pdf
